# Supplementary material for: Micro-Sized MoS6@15%Li7P3S11 Composite Enables Stable All-Solid-State Battery with High Capacity
Source: MDPI journal article supplement (doi:10.3390/batteries9110560), 2023-11-17
Supplement: s1 [file s1]

## Supporting Information

### Micro-Sized MoS<sub>6</sub>@15%Li<sub>7</sub>P<sub>3</sub>S<sub>11</sub> Composite Enables Stable All-Solid-State Battery with High Capacity

Mingyuan Chang<sup>1,2,3</sup>, Mengli Yang<sup>1</sup>, Wenrui Xie<sup>1</sup>, Fuli Tian<sup>1</sup>, Gaozhan Liu<sup>1</sup>,

Ping Cui<sup>1,4</sup>, Tao Wu<sup>2,3,5\*</sup>, Xiayin Yao<sup>1,4\*</sup>

<sup>1</sup> Ningbo Institute of Materials Technology and Engineering, Chinese Academy of Sciences, Ningbo 315201, P.R. China

<sup>2</sup> Municipal Key Laboratory of Clean Energy Technologies of Ningbo, University of Nottingham Ningbo China, Ningbo 315100, China

<sup>3</sup> Department of Chemical and Environmental Engineering, University of Nottingham Ningbo China, Ningbo 315100, China

<sup>4</sup> Center of Materials Science and Optoelectronics Engineering, University of Chinese Academy of Sciences, Beijing 100049, P.R. China

<sup>5</sup> Key Laboratory of Carbonaceous Wastes Processing and Process Intensification of Zhejiang

\* Correspondence authors: tao.wu@nottingham.edu.cn; yaoxy@nimte.ac.cn.

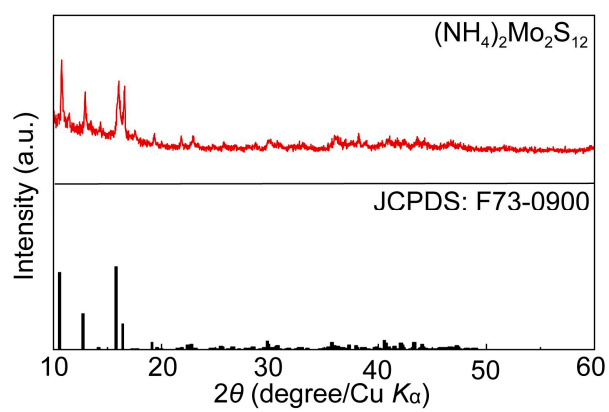

**Figure S1.** XRD pattern of  $(\text{NH}_4)_2\text{Mo}_2\text{S}_{12}$ .

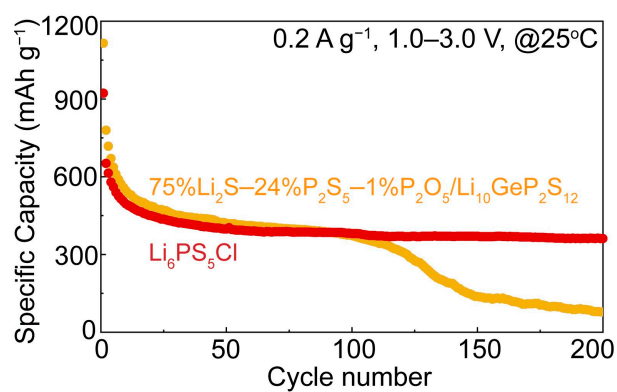

**Figure S2.** Cyclic performances of Li/Li<sub>6</sub>PS<sub>5</sub>Cl/MoS<sub>6</sub> and Li/75%Li<sub>2</sub>S-24%P<sub>2</sub>S<sub>5</sub>-1%P<sub>2</sub>O<sub>5</sub>/Li<sub>10</sub>GeP<sub>2</sub>S<sub>12</sub>/MoS<sub>6</sub> all-solid-state batteries under 0.2 A g<sup>-1</sup>.

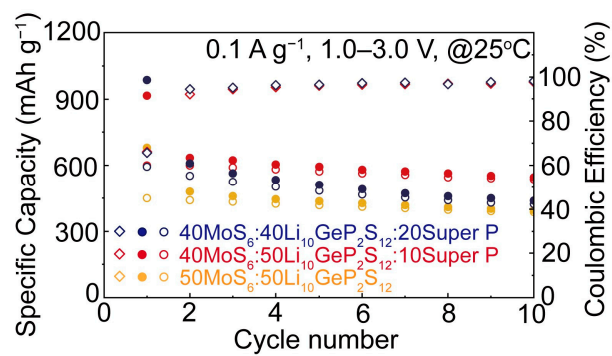

**Figure S3.** Cyclic performances of all-solid-state batteries with  $50\text{MoS}_6:50\text{Li}_{10}\text{GeP}_2\text{S}_{12}$ ,  $40\text{MoS}_6:50\text{Li}_{10}\text{GeP}_2\text{S}_{12}:10\text{Super P}$  and  $40\text{MoS}_6:40\text{Li}_{10}\text{GeP}_2\text{S}_{12}:20\text{Super P}$  cathodes under  $0.1 \text{ A g}^{-1}$ .

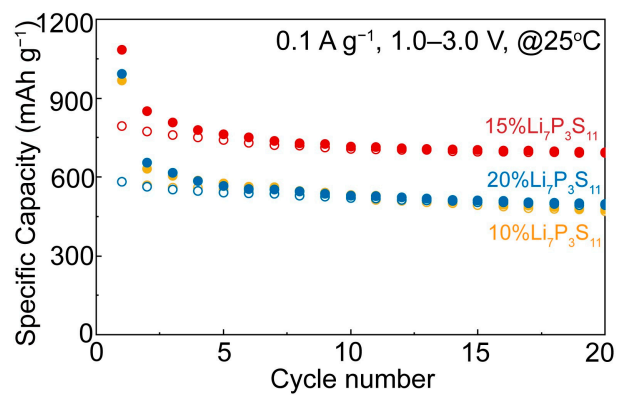

**Figure S4.** Cyclic performances of MoS<sub>6</sub>@10%Li<sub>7</sub>P<sub>3</sub>S<sub>11</sub>, MoS<sub>6</sub>@15%Li<sub>7</sub>P<sub>3</sub>S<sub>11</sub> and MoS<sub>6</sub>@20%Li<sub>7</sub>P<sub>3</sub>S<sub>11</sub> cathodes under 0.1 A g<sup>-1</sup>.

**Table S1.** Inductively coupled plasma emission spectrometer analysis of MoS<sub>6</sub>.

| Elements | S    | Mo   |
|----------|------|------|
| Weight % | 63.5 | 31.5 |
| Atom %   | 85.7 | 14.2 |

**Table S2.** Electrochemical performances comparisons of various active materials in all-solid-state-batteries.

| Active Material                                                                | Electrolyte                                                                                                                                   | Anode | Voltage<br>Range<br>(V) | Initial<br>Capacity<br>(mAh g <sup>-1</sup> ) | Reversible<br>Capacity<br>(mAh g <sup>-1</sup> ) | Reference |
|--------------------------------------------------------------------------------|-----------------------------------------------------------------------------------------------------------------------------------------------|-------|-------------------------|-----------------------------------------------|--------------------------------------------------|-----------|
| rGO-MoS <sub>3</sub>                                                           | Li <sub>10</sub> GeP <sub>2</sub> S <sub>12</sub> /75%Li <sub>2</sub> S–<br>24%P <sub>2</sub> S <sub>5</sub> –1%P <sub>2</sub> O <sub>5</sub> | Li    | 0.5–3 V                 | 1241.4                                        | ~760                                             | 17        |
| Cubic FeS <sub>2</sub>                                                         | 77.5%Li <sub>2</sub> S–22.5%P <sub>2</sub> S <sub>5</sub>                                                                                     | Li    | 1–3 V                   | 750                                           | ~730                                             | 10        |
| Co <sub>9</sub> S <sub>8</sub> @Li <sub>7</sub> P <sub>3</sub> S <sub>11</sub> | Li <sub>10</sub> GeP <sub>2</sub> S <sub>12</sub> /75%Li <sub>2</sub> S–<br>24%P <sub>2</sub> S <sub>5</sub> –1%P <sub>2</sub> O <sub>5</sub> | Li    | 0.5–3 V                 | 633                                           | 574                                              | 21        |
| MoS <sub>2</sub> @Li <sub>7</sub> P <sub>3</sub> S <sub>11</sub>               | Li <sub>7</sub> P <sub>3</sub> S <sub>11</sub>                                                                                                | Li    | 0.1–3 V                 | 868.4                                         | 669.2                                            | 19        |
| MoS <sub>6</sub>                                                               | Li <sub>6</sub> PS <sub>5</sub> Cl                                                                                                            | Li    | 1–3 V                   | 913.9                                         | 635.1                                            | This work |
| MoS <sub>6</sub> @15%Li <sub>7</sub> P <sub>3</sub> S <sub>11</sub>            | Li <sub>6</sub> PS <sub>5</sub> Cl                                                                                                            | Li    | 1–3 V                   | 1083.8                                        | 851.5                                            | This work |

**Table S3.** EIS fitting results of MoS<sub>6</sub> and MoS<sub>6</sub>@15%Li<sub>7</sub>P<sub>3</sub>S<sub>11</sub> under 0.1 A g<sup>-1</sup> after 20 cycles.

| Cathode materials                                                   | 1 <sup>st</sup> cycle |                       | 20 <sup>th</sup> cycle |                       |
|---------------------------------------------------------------------|-----------------------|-----------------------|------------------------|-----------------------|
|                                                                     | $R_e$ ( $\Omega$ )    | $R_{ct}$ ( $\Omega$ ) | $R_e$ ( $\Omega$ )     | $R_{ct}$ ( $\Omega$ ) |
| MoS <sub>6</sub>                                                    | 105.42                | /                     | 384.11                 | 52.96                 |
| MoS <sub>6</sub> @15%Li <sub>7</sub> P <sub>3</sub> S <sub>11</sub> | 75.89                 | /                     | 124.79                 | 10.78                 |



**Table S4.** MoS<sub>6</sub> values used in energy density and power density calculations.

| Current density<br>(A g <sup>-1</sup> ) | Energy density<br>of active<br>materials<br>(Wh kg <sup>-1</sup> ) | Energy<br>density of<br>cathode layer<br>(Wh kg <sup>-1</sup> ) | Time duration<br>(h) | Power density<br>(W kg <sup>-1</sup> ) |
|-----------------------------------------|--------------------------------------------------------------------|-----------------------------------------------------------------|----------------------|----------------------------------------|
| 0.1                                     | 1209.2                                                             | 495.8                                                           | 7.07                 | 70.12                                  |
| 0.2                                     | 915.2                                                              | 375.2                                                           | 2.66                 | 141.1                                  |
| 0.5                                     | 706.2                                                              | 289.5                                                           | 0.84                 | 344.7                                  |
| 1.0                                     | 559.8                                                              | 229.5                                                           | 0.34                 | 675.1                                  |
| 2.0                                     | 422.4                                                              | 173.2                                                           | 0.13                 | 1332.2                                 |

**Table S5.** MoS<sub>6</sub>@15%Li<sub>7</sub>P<sub>3</sub>S<sub>11</sub> composite values used in energy density and power density calculations.

| Current density<br>(A g <sup>-1</sup> ) | Energy density of active materials<br>(Wh kg <sup>-1</sup> ) | Energy density of cathode layer<br>(Wh kg <sup>-1</sup> ) | Time duration (h) | Power density (W kg <sup>-1</sup> ) |
|-----------------------------------------|--------------------------------------------------------------|-----------------------------------------------------------|-------------------|-------------------------------------|
| 0.1                                     | 1434.2                                                       | 588                                                       | 8.27              | 71.1                                |
| 0.2                                     | 1160.7                                                       | 475.9                                                     | 3.33              | 142.9                               |
| 0.5                                     | 944                                                          | 387                                                       | 0.84              | 351.9                               |
| 1.0                                     | 794.7                                                        | 325.8                                                     | 0.47              | 693.2                               |
| 2.0                                     | 629.3                                                        | 258                                                       | 0.19              | 1358                                |
